# Supplementary material for: Angiotensin-Converting Enzyme 2 Protein Is Overexpressed in a Wide Range of Human Tumour Types: A Systematic Tissue Microarray Study on >15,000 Tumours
Source: MDPI journal article supplement (doi:10.3390/biomedicines9121831), 2021-12-03
Supplement: s1 [file s1]

**Table S1:** ACE2 immunostaining in human tumours.

| Tumour entity                                     | On TMA (n) | Analysable (n) | ACE2 immunostaining |          |              |            |                  |              |
|---------------------------------------------------|------------|----------------|---------------------|----------|--------------|------------|------------------|--------------|
|                                                   |            |                | In tumour cells     |          |              |            | In blood vessels |              |
|                                                   |            |                | Negative (%)        | Weak (%) | Moderate (%) | Strong (%) | Negative (%)     | Positive (%) |
| Pilomatrixoma                                     | 35         | 34             | 82.4                | 14.7     | 2.9          | 0.0        | 100.0            | 0.0          |
| Basal cell carcinoma                              | 88         | 52             | 98.1                | 1.9      | 0.0          | 0.0        | 100.0            | 0.0          |
| Benign nevus                                      | 29         | 26             | 100.0               | 0.0      | 0.0          | 0.0        | 100.0            | 0.0          |
| Squamous cell carcinoma of the skin               | 90         | 83             | 92.8                | 7.2      | 0.0          | 0.0        | 100.0            | 0.0          |
| Malignant melanoma                                | 48         | 43             | 97.7                | 0.0      | 0.0          | 2.3        | 100.0            | 0.0          |
| Merkel cell carcinoma                             | 46         | 43             | 100.0               | 0.0      | 0.0          | 0.0        | 100.0            | 0.0          |
| Squamous cell carcinoma of the larynx             | 110        | 92             | 88.0                | 10.9     | 1.1          | 0.0        | 100.0            | 0.0          |
| Squamous cell carcinoma of the pharynx            | 60         | 50             | 92.0                | 8.0      | 0.0          | 0.0        | 100.0            | 0.0          |
| Oral squamous cell carcinoma (floor of the mouth) | 130        | 109            | 90.8                | 9.2      | 0.0          | 0.0        | 100.0            | 0.0          |
| Pleomorphic adenoma of the parotid gland          | 50         | 46             | 100.0               | 0.0      | 0.0          | 0.0        | 100.0            | 0.0          |
| Warthin tumour of the parotid gland               | 49         | 44             | 81.8                | 18.2     | 0.0          | 0.0        | 95.5             | 4.5          |
| Basal cell adenoma of the salivary gland          | 15         | 13             | 100.0               | 0.0      | 0.0          | 0.0        | 100.0            | 0.0          |
| Adenocarcinoma of the lung                        | 246        | 167            | 64.7                | 25.7     | 4.8          | 4.8        | 100.0            | 0.0          |
| Squamous cell carcinoma of the lung               | 130        | 68             | 86.8                | 11.8     | 1.5          | 0.0        | 100.0            | 0.0          |
| Small cell carcinoma of the lung                  | 20         | 16             | 93.8                | 6.3      | 0.0          | 0.0        | 100.0            | 0.0          |
| Mesothelioma, epitheloid                          | 39         | 30             | 93.3                | 6.7      | 0.0          | 0.0        | 96.7             | 3.3          |
| Mesothelioma, other types                         | 76         | 63             | 95.2                | 4.8      | 0.0          | 0.0        | 100.0            | 0.0          |
| Thymoma                                           | 29         | 28             | 100.0               | 0.0      | 0.0          | 0.0        | 100.0            | 0.0          |
| Squamous cell carcinoma of the vagina             | 78         | 67             | 88.1                | 11.9     | 0.0          | 0.0        | 100.0            | 0.0          |
| Squamous cell carcinoma of the vulva              | 130        | 115            | 85.2                | 13.0     | 0.0          | 1.7        | 100.0            | 0.0          |

|                                              |      |      |       |      |      |      |       |     |
|----------------------------------------------|------|------|-------|------|------|------|-------|-----|
| Squamous cell carcinoma of the cervix        | 130  | 124  | 75.8  | 22.6 | 1.6  | 0.0  | 100.0 | 0.0 |
| Endometrioid endometrial carcinoma           | 236  | 222  | 88.3  | 11.7 | 0.0  | 0.0  | 100.0 | 0.0 |
| Endometrial serous carcinoma                 | 82   | 73   | 80.8  | 13.7 | 4.1  | 1.4  | 100.0 | 0.0 |
| Carcinosarcoma of the uterus                 | 48   | 41   | 85.4  | 14.6 | 0.0  | 0.0  | 100.0 | 0.0 |
| Endometrial carcinoma, high grade, G3        | 13   | 13   | 84.6  | 7.7  | 0.0  | 7.7  | 100.0 | 0.0 |
| Endometrial clear cell carcinoma             | 8    | 7    | 28.6  | 42.9 | 28.6 | 0.0  | 100.0 | 0.0 |
| Endometrioid carcinoma of the ovary          | 110  | 94   | 70.2  | 28.7 | 0.0  | 1.1  | 97.9  | 2.1 |
| Serous carcinoma of the ovary                | 559  | 474  | 89.7  | 10.3 | 0.0  | 0.0  | 100.0 | 0.0 |
| Mucinous carcinoma of the ovary              | 96   | 75   | 38.7  | 49.3 | 8.0  | 4.0  | 98.7  | 1.3 |
| Clear cell carcinoma of the ovary            | 50   | 41   | 34.1  | 39.0 | 14.6 | 12.2 | 100.0 | 0.0 |
| Carcinosarcoma of the ovary                  | 47   | 38   | 84.2  | 15.8 | 0.0  | 0.0  | 100.0 | 0.0 |
| Brenner tumour                               | 9    | 9    | 66.7  | 33.3 | 0.0  | 0.0  | 100.0 | 0.0 |
| Invasive breast carcinoma of no special type | 1391 | 1213 | 92.2  | 4.1  | 2.0  | 1.7  | 100.0 | 0.0 |
| Lobular carcinoma of the breast              | 294  | 246  | 98.0  | 0.8  | 0.4  | 0.8  | 100.0 | 0.0 |
| Medullary carcinoma of the breast            | 26   | 26   | 84.6  | 11.5 | 3.8  | 0.0  | 100.0 | 0.0 |
| Tubular carcinoma of the breast              | 27   | 24   | 100.0 | 0.0  | 0.0  | 0.0  | 100.0 | 0.0 |
| Mucinous carcinoma of the breast             | 58   | 43   | 97.7  | 2.3  | 0.0  | 0.0  | 100.0 | 0.0 |
| Phyllodes tumour of the breast               | 50   | 50   | 100.0 | 0.0  | 0.0  | 0.0  | 100.0 | 0.0 |
| Adenomatous polyp, low-grade dysplasia       | 50   | 47   | 17.0  | 72.3 | 6.4  | 4.3  | 100.0 | 0.0 |
| Adenomatous polyp, high-grade dysplasia      | 50   | 48   | 20.8  | 45.8 | 16.7 | 16.7 | 100.0 | 0.0 |
| Adenocarcinoma of the colon                  | 1932 | 1645 | 18.7  | 43.5 | 26.2 | 11.7 | 100.0 | 0.0 |
| Gastric adenocarcinoma, diffuse type         | 226  | 141  | 53.9  | 33.3 | 5.0  | 7.8  | 100.0 | 0.0 |
| Gastric adenocarcinoma, intestinal type      | 224  | 144  | 51.4  | 34.0 | 9.0  | 5.6  | 100.0 | 0.0 |
| Gastric adenocarcinoma, mixed type           | 62   | 48   | 56.3  | 33.3 | 6.3  | 4.2  | 100.0 | 0.0 |
| Adenocarcinoma of the oesophagus             | 133  | 64   | 59.4  | 31.3 | 3.1  | 6.3  | 100.0 | 0.0 |
| Squamous cell carcinoma of the oesophagus    | 124  | 44   | 93.2  | 6.8  | 0.0  | 0.0  | 100.0 | 0.0 |
| Squamous cell carcinoma of the anal canal    | 91   | 77   | 80.5  | 15.6 | 2.6  | 1.3  | 100.0 | 0.0 |
| Cholangiocarcinoma                           | 114  | 95   | 42.1  | 34.7 | 9.5  | 13.7 | 100.0 | 0.0 |

|                                                                |     |     |       |      |      |      |       |      |
|----------------------------------------------------------------|-----|-----|-------|------|------|------|-------|------|
| Hepatocellular carcinoma                                       | 50  | 41  | 43.9  | 31.7 | 9.8  | 14.6 | 100.0 | 0.0  |
| Ductal adenocarcinoma of the pancreas                          | 662 | 454 | 59.7  | 32.4 | 4.8  | 3.1  | 98.2  | 1.8  |
| Pancreatic/Ampullary adenocarcinoma                            | 119 | 76  | 46.1  | 40.8 | 11.8 | 1.3  | 97.4  | 2.6  |
| Acinar cell carcinoma of the pancreas                          | 15  | 14  | 85.7  | 14.3 | 0.0  | 0.0  | 100.0 | 0.0  |
| Gastrointestinal stromal tumour (GIST)                         | 50  | 49  | 98.0  | 0.0  | 2.0  | 0.0  | 83.7  | 16.3 |
| Non-invasive papillary urothelial carcinoma, pTa G2 low grade  | 177 | 146 | 89.7  | 9.6  | 0.7  | 0.0  | 100.0 | 0.0  |
| Non-invasive papillary urothelial carcinoma, pTa G2 high grade | 141 | 124 | 85.5  | 13.7 | 0.8  | 0.0  | 100.0 | 0.0  |
| Non-invasive papillary urothelial carcinoma, pTa G3            | 187 | 164 | 72.0  | 24.4 | 2.4  | 1.2  | 100.0 | 0.0  |
| Urothelial carcinoma, pT2-4 G3                                 | 624 | 532 | 82.0  | 15.0 | 1.5  | 1.5  | 100.0 | 0.0  |
| Small cell neuroendocrine carcinoma of the bladder             | 18  | 18  | 94.4  | 5.6  | 0.0  | 0.0  | 100.0 | 0.0  |
| Sarcomatoid urothelial carcinoma                               | 25  | 24  | 87.5  | 12.5 | 0.0  | 0.0  | 100.0 | 0.0  |
| Clear cell renal cell carcinoma                                | 858 | 620 | 14.2  | 17.7 | 14.0 | 54.0 | 99.8  | 0.2  |
| Papillary renal cell carcinoma                                 | 255 | 183 | 6.0   | 10.4 | 9.3  | 74.3 | 100.0 | 0.0  |
| Clear cell (tubulo) papillary renal cell carcinoma             | 21  | 16  | 25.0  | 25.0 | 25.0 | 25.0 | 100.0 | 0.0  |
| Chromophobe renal cell carcinoma                               | 131 | 106 | 96.2  | 1.9  | 0.0  | 1.9  | 88.7  | 11.3 |
| Oncocytoma                                                     | 177 | 129 | 96.9  | 1.6  | 0.8  | 0.8  | 84.5  | 15.5 |
| Adenocarcinoma of the prostate, Gleason 3+3                    | 83  | 80  | 91.3  | 7.5  | 1.3  | 0.0  | 100.0 | 0.0  |
| Adenocarcinoma of the prostate, Gleason 4+4                    | 80  | 73  | 91.8  | 6.8  | 0.0  | 1.4  | 100.0 | 0.0  |
| Adenocarcinoma of the prostate, Gleason 5+5                    | 85  | 78  | 93.6  | 5.1  | 0.0  | 1.3  | 98.7  | 1.3  |
| Adenocarcinoma of the prostate (recurrence)                    | 261 | 212 | 80.7  | 17.9 | 0.9  | 0.5  | 97.6  | 2.4  |
| Small cell neuroendocrine carcinoma of the prostate            | 17  | 16  | 100.0 | 0.0  | 0.0  | 0.0  | 100.0 | 0.0  |
| Seminoma                                                       | 621 | 546 | 98.0  | 1.8  | 0.0  | 0.2  | 97.6  | 2.4  |
| Embryonal carcinoma of the testis                              | 50  | 40  | 72.5  | 27.5 | 0.0  | 0.0  | 95.0  | 5.0  |
| Yolk sack tumour                                               | 50  | 38  | 42.1  | 57.9 | 0.0  | 0.0  | 97.4  | 2.6  |
| Teratoma                                                       | 50  | 44  | 72.7  | 18.2 | 6.8  | 2.3  | 93.2  | 6.8  |
| Squamous cell carcinoma of the penis                           | 80  | 66  | 90.9  | 7.6  | 1.5  | 0.0  | 100.0 | 0.0  |
| Adenoma of the thyroid gland                                   | 114 | 106 | 85.8  | 13.2 | 0.9  | 0.0  | 47.2  | 52.8 |
| Papillary thyroid carcinoma                                    | 392 | 357 | 92.2  | 7.6  | 0.3  | 0.0  | 83.5  | 16.5 |

|                                                       |     |     |       |      |     |     |       |      |
|-------------------------------------------------------|-----|-----|-------|------|-----|-----|-------|------|
| Follicular thyroid carcinoma                          | 158 | 141 | 80.1  | 19.9 | 0.0 | 0.0 | 72.3  | 27.7 |
| Medullary thyroid carcinoma                           | 107 | 95  | 96.8  | 3.2  | 0.0 | 0.0 | 51.6  | 48.4 |
| Anaplastic thyroid carcinoma                          | 45  | 42  | 92.9  | 7.1  | 0.0 | 0.0 | 100.0 | 0.0  |
| Phaeochromocytoma                                     | 50  | 44  | 100.0 | 0.0  | 0.0 | 0.0 | 100.0 | 0.0  |
| Appendix, neuroendocrine tumour (NET)                 | 22  | 13  | 76.9  | 15.4 | 7.7 | 0.0 | 100.0 | 0.0  |
| Colorectal, neuroendocrine tumour (NET)               | 11  | 10  | 90.0  | 10.0 | 0.0 | 0.0 | 80.0  | 20.0 |
| Ileum, neuroendocrine tumour (NET)                    | 49  | 44  | 97.7  | 2.3  | 0.0 | 0.0 | 56.8  | 43.2 |
| Lung, neuroendocrine tumour (NET)                     | 19  | 17  | 88.2  | 5.9  | 0.0 | 5.9 | 64.7  | 35.3 |
| Pancreas, neuroendocrine tumour (NET)                 | 98  | 91  | 87.9  | 5.5  | 3.3 | 3.3 | 29.7  | 70.3 |
| Colorectal, neuroendocrine carcinoma (NEC)            | 12  | 10  | 100.0 | 0.0  | 0.0 | 0.0 | 80.0  | 20.0 |
| Gallbladder, neuroendocrine carcinoma (NEC)           | 4   | 4   | 100.0 | 0.0  | 0.0 | 0.0 | 100.0 | 0.0  |
| Pancreas, neuroendocrine carcinoma (NEC)              | 14  | 14  | 100.0 | 0.0  | 0.0 | 0.0 | 78.6  | 21.4 |
| Hodgkin Lymphoma                                      | 103 | 81  | 100.0 | 0.0  | 0.0 | 0.0 | 98.8  | 1.2  |
| Non-Hodgkin Lymphoma                                  | 62  | 52  | 100.0 | 0.0  | 0.0 | 0.0 | 100.0 | 0.0  |
| Small lymphocytic lymphoma, B-cell type (B-SLL/B-CLL) | 50  | 32  | 100.0 | 0.0  | 0.0 | 0.0 | 100.0 | 0.0  |
| Diffuse large B cell lymphoma (DLBCL)                 | 114 | 98  | 100.0 | 0.0  | 0.0 | 0.0 | 100.0 | 0.0  |
| Follicular lymphoma                                   | 88  | 66  | 100.0 | 0.0  | 0.0 | 0.0 | 100.0 | 0.0  |
| T-cell Non Hodgkin lymphoma                           | 24  | 18  | 100.0 | 0.0  | 0.0 | 0.0 | 100.0 | 0.0  |
| Mantle cell lymphoma                                  | 18  | 14  | 100.0 | 0.0  | 0.0 | 0.0 | 100.0 | 0.0  |
| Marginal zone lymphoma                                | 16  | 11  | 100.0 | 0.0  | 0.0 | 0.0 | 100.0 | 0.0  |
| Diffuse large B-cell lymphoma (DLBCL) in the testis   | 16  | 14  | 100.0 | 0.0  | 0.0 | 0.0 | 100.0 | 0.0  |
| Burkitt lymphoma                                      | 5   | 1   | 100.0 | 0.0  | 0.0 | 0.0 | 100.0 | 0.0  |
| Tenosynovial giant cell tumour                        | 45  | 44  | 100.0 | 0.0  | 0.0 | 0.0 | 100.0 | 0.0  |
| Granular cell tumour                                  | 53  | 46  | 100.0 | 0.0  | 0.0 | 0.0 | 100.0 | 0.0  |
| Leiomyoma                                             | 50  | 48  | 100.0 | 0.0  | 0.0 | 0.0 | 91.7  | 8.3  |
| Leiomyosarcoma                                        | 87  | 82  | 96.3  | 2.4  | 1.2 | 0.0 | 97.6  | 2.4  |
| Liposarcoma                                           | 132 | 127 | 100.0 | 0.0  | 0.0 | 0.0 | 100.0 | 0.0  |
| Malignant peripheral nerve sheath tumour (MPNST)      | 13  | 11  | 100.0 | 0.0  | 0.0 | 0.0 | 100.0 | 0.0  |

|                                         |       |     |       |     |     |     |       |      |
|-----------------------------------------|-------|-----|-------|-----|-----|-----|-------|------|
| Myofibrosarcoma                         | 26    | 26  | 100.0 | 0.0 | 0.0 | 0.0 | 100.0 | 0.0  |
| Angiosarcoma                            | 73    | 63  | 98.4  | 1.6 | 0.0 | 0.0 | 100.0 | 0.0  |
| Angiomyolipoma                          | 91    | 91  | 100.0 | 0.0 | 0.0 | 0.0 | 100.0 | 0.0  |
| Dermatofibrosarcoma protuberans         | 21    | 18  | 100.0 | 0.0 | 0.0 | 0.0 | 100.0 | 0.0  |
| Ganglioneuroma                          | 14    | 12  | 100.0 | 0.0 | 0.0 | 0.0 | 75.0  | 25.0 |
| Kaposi sarcoma                          | 8     | 6   | 100.0 | 0.0 | 0.0 | 0.0 | 100.0 | 0.0  |
| Neurofibroma                            | 117   | 88  | 100.0 | 0.0 | 0.0 | 0.0 | 100.0 | 0.0  |
| Sarcoma, not otherwise specified (NOS)  | 75    | 71  | 94.4  | 4.2 | 1.4 | 0.0 | 100.0 | 0.0  |
| Paraganglioma                           | 41    | 37  | 100.0 | 0.0 | 0.0 | 0.0 | 89.2  | 10.8 |
| Primitive neuroectodermal tumour (PNET) | 23    | 18  | 100.0 | 0.0 | 0.0 | 0.0 | 100.0 | 0.0  |
| Rhabdomyosarcoma                        | 7     | 7   | 100.0 | 0.0 | 0.0 | 0.0 | 100.0 | 0.0  |
| Schwannoma                              | 121   | 107 | 100.0 | 0.0 | 0.0 | 0.0 | 100.0 | 0.0  |
| Synovial sarcoma                        | 12    | 11  | 100.0 | 0.0 | 0.0 | 0.0 | 100.0 | 0.0  |
| Osteosarcoma                            | 43    | 34  | 94.1  | 2.9 | 0.0 | 2.9 | 100.0 | 0.0  |
| Chondrosarcoma                          | 38    | 21  | 100.0 | 0.0 | 0.0 | 0.0 | 100.0 | 0.0  |
| Total N                                 | 15306 |     |       |     |     |     |       |      |
